# Supplementary material for: Efficiency of Exome Sequencing for the Molecular Diagnosis of Pseudoxanthoma Elasticum
Source: PubMed Central journal article supplement — J Invest Dermatol. 2014 Oct 30;135(4):992–8. doi: 10.1038/jid.2014.421 (PMC4378258; doi:10.1038/jid.2014.421), 2014-10-30
Supplement: jid2014421x1.pdf [file jid2014421x1.pdf]

Table S1: Exons covered at  $\geq 5$  depth in the *ABCC6* gene

| Patient       | P1 | P2 | P3 | P4 | P5 | P6 | P7 | P8 | P9 | P10 | P11 | P12 | P13 | P14 | P15 | P16 |
|---------------|----|----|----|----|----|----|----|----|----|-----|-----|-----|-----|-----|-----|-----|
| <b>Exon1</b>  | x  | x  | x  | x  | x  | x  | x  | x  | x  | x   | x   | x   | x   | x   | x   | x   |
| <b>Exon2</b>  | x  | x  | x  | x  | x  | x  | x  | x  | x  | x   | x   | x   | x   | x   | x   | x   |
| <b>Exon3</b>  | x  | x  | x  | x  | x  | x  | x  | x  | x  | x   | x   | x   | x   | x   | x   | x   |
| <b>Exon4</b>  | x  | x  | x  | x  | x  | x  | x  | x  | x  | x   | x   | x   | x   | x   | x   | x   |
| <b>Exon5</b>  | x  | x  | x  | x  | x  | x  | x  | x  | x  | x   | x   | x   | x   | x   | x   | x   |
| <b>Exon6</b>  | x  | x  | x  | x  | x  | x  | x  | x  | x  | x   | x   | x   | x   | x   | x   | x   |
| <b>Exon7</b>  | x  | x  | x  | x  | x  | x  | x  | x  | x  | x   | x   | x   | x   | x   | x   | x   |
| <b>Exon8</b>  | x  | x  | x  | x  | x  | x  | x  | x  | x  | x   | x   | x   | x   | x   | x   | x   |
| <b>Exon9</b>  |    | x  | x  | x  | x  | x  | x  | x  | x  | x   | x   | x   | x   | x   | x   | x   |
| <b>Exon10</b> | x  | x  | x  | x  | x  | x  | x  | x  | x  | x   | x   | x   | x   | x   | x   | x   |
| <b>Exon11</b> | x  |    | x  | x  | x  | x  | x  | x  | x  | x   | x   | x   | x   | x   | x   | x   |
| <b>Exon12</b> | x  |    | x  | x  | x  |    | x  | x  | x  | x   | x   | x   | x   | x   | x   | x   |
| <b>Exon13</b> | x  |    | x  | x  | x  | x  | x  |    |    | x   | x   | x   | x   | x   | x   | x   |
| <b>Exon14</b> | x  | x  | x  | x  | x  | x  | x  | x  | x  | x   | x   | x   | x   | x   | x   | x   |
| <b>Exon15</b> |    | x  | x  | x  | x  | x  | x  | x  | x  | x   | x   | x   | x   | x   | x   | x   |
| <b>Exon16</b> | x  | x  | x  | x  | x  | x  | x  | x  | x  | x   | x   | x   | x   | x   | x   | x   |
| <b>Exon17</b> | x  | x  | x  | x  | x  | x  | x  | x  | x  | x   | x   | x   | x   | x   | x   | x   |
| <b>Exon18</b> | x  | x  | x  | x  | x  | x  | x  | x  | x  | x   | x   | x   | x   | x   | x   | x   |
| <b>Exon19</b> | x  | x  | x  | x  | x  | x  | x  | x  | x  | x   | x   | x   | x   | x   | x   | x   |
| <b>Exon20</b> | x  |    | x  | x  | x  | x  | x  | x  | x  | x   | x   | x   | x   | x   | x   | x   |
| <b>Exon21</b> | x  | x  | x  | x  | x  | x  | x  | x  | x  | x   | x   | x   | x   | x   | x   | x   |
| <b>Exon22</b> | x  | x  | x  | x  | x  | x  | x  | x  | x  | x   | x   | x   | x   | x   | x   | x   |
| <b>Exon23</b> |    |    | x  | x  | x  | x  | x  | x  | x  | x   | x   | x   | x   | x   | x   | x   |
| <b>Exon24</b> | x  |    | x  | x  | x  | x  | x  | x  | x  | x   | x   | x   | x   | x   | x   | x   |
| <b>Exon25</b> | x  | x  | x  | x  | x  | x  | x  | x  | x  | x   | x   | x   | x   | x   | x   | x   |
| <b>Exon26</b> | x  | x  | x  | x  | x  | x  | x  | x  | x  | x   | x   | x   | x   | x   | x   | x   |
| <b>Exon27</b> | x  | x  | x  | x  | x  | x  | x  | x  | x  | x   | x   | x   | x   | x   | x   | x   |
| <b>Exon28</b> | x  | x  | x  | x  | x  | x  | x  | x  | x  | x   | x   | x   | x   | x   | x   | x   |
| <b>Exon29</b> | x  | x  | x  | x  | x  | x  | x  | x  | x  | x   | x   | x   | x   | x   | x   | x   |

**Exon30**                    x    x    x                    x    x    x    x    x    x    x    x    x    x

**Exon31**

**% total**    84    77    97    97    97    94    97    97    94    97    97    97    97    97    97    97

**exons**

---

Table S2: Exons covered  $\geq 5$  depth in the *GGCX* gene

| Patient        | P1 | P2 | P3 | P4 | P5 | P6 | P7 | P8 | P9 | P10 | P11 | P12 | P13 | P14 | P15 | P16 |
|----------------|----|----|----|----|----|----|----|----|----|-----|-----|-----|-----|-----|-----|-----|
| <b>Exon1</b>   |    |    |    |    |    |    |    |    |    |     |     |     |     |     |     |     |
| <b>Exon2</b>   | x  | x  | x  | x  | x  | x  | x  | x  | x  | x   | x   | x   | x   | x   | x   | x   |
| <b>Exon3</b>   | x  | x  | x  | x  | x  | x  | x  | x  | x  | x   | x   | x   | x   | x   | x   | x   |
| <b>Exon4</b>   | x  | x  | x  | x  | x  | x  | x  | x  | x  | x   | x   | x   | x   | x   | x   | x   |
| <b>Exon5</b>   |    |    | x  | x  | x  | x  | x  | x  | x  | x   | x   | x   | x   | x   | x   | x   |
| <b>Exon6</b>   | x  |    | x  | x  | x  | x  | x  | x  | x  | x   | x   | x   | x   | x   | x   | x   |
| <b>Exon7</b>   | x  |    | x  | x  | x  | x  | x  | x  | x  | x   | x   | x   | x   | x   | x   | x   |
| <b>Exon8</b>   |    |    | x  | x  | x  | x  | x  | x  | x  | x   | x   | x   | x   | x   | x   | x   |
| <b>Exon9</b>   | x  | x  | x  | x  | x  | x  | x  | x  | x  | x   | x   | x   | x   | x   | x   | x   |
| <b>Exon10</b>  | x  | x  | x  | x  | x  | x  | x  | x  | x  | x   | x   | x   | x   | x   | x   | x   |
| <b>Exon11</b>  | x  |    | x  | x  | x  | x  | x  | x  | x  | x   | x   | x   | x   | x   | x   | x   |
| <b>Exon12</b>  | x  | x  | x  | x  | x  | x  | x  | x  | x  | x   | x   | x   | x   | x   | x   | x   |
| <b>Exon13</b>  | x  |    | x  | x  | x  | x  | x  | x  | x  | x   | x   | x   | x   | x   | x   | x   |
| <b>Exon14</b>  | x  |    | x  | x  | x  | x  |    | x  | x  | x   | x   | x   | x   | x   | x   | x   |
| <b>Exon15</b>  | x  | x  | x  | x  | x  | x  | x  | x  | x  | x   | x   | x   | x   | x   | x   | x   |
| <b>Exon16</b>  |    |    | x  |    |    | x  |    |    |    | x   | x   |     |     | x   | x   |     |
| <b>Exon17</b>  | x  | x  | x  | x  | x  | x  | x  | x  | x  | x   | x   | x   | x   | x   | x   | x   |
| <b>Exon18</b>  | x  | x  | x  | x  | x  | x  | x  | x  | x  | x   | x   | x   | x   | x   | x   | x   |
| <b>Exon19</b>  |    |    | x  | x  | x  | x  | x  | x  | x  | x   | x   | x   | x   | x   | x   | x   |
| <b>Exon20</b>  |    | x  | x  | x  | x  | x  | x  | x  | x  | x   | x   | x   | x   | x   | x   | x   |
| <b>Exon21</b>  | x  | x  | x  | x  | x  | x  |    | x  | x  | x   | x   | x   | x   | x   | x   | x   |
| <b>Exon22</b>  |    |    |    | x  | x  | x  | x  | x  | x  | x   | x   | x   | x   | x   | x   | x   |
| <b>Exon23</b>  | x  | x  | x  | x  | x  | x  | x  | x  | x  | x   | x   | x   | x   | x   | x   | x   |
| <b>Exon24</b>  | x  | x  | x  | x  | x  | x  | x  | x  | x  | x   | x   | x   | x   | x   | x   | x   |
| <b>Exon25</b>  |    |    |    |    |    |    |    |    |    |     |     |     |     |     |     |     |
| <b>% total</b> | 68 | 52 | 88 | 88 | 88 | 92 | 80 | 88 | 88 | 92  | 92  | 88  | 88  | 92  | 92  | 88  |
| <b>Exons</b>   |    |    |    |    |    |    |    |    |    |     |     |     |     |     |     |     |

Table S3: Exons covered  $\geq 5$  depth in the *ENPP1* gene

| Patient        | P1 | P2 | P3 | P4 | P5 | P6 | P7 | P8 | P9 | P10 | P11 | P12 | P13 | P14 | P15 | P16 |
|----------------|----|----|----|----|----|----|----|----|----|-----|-----|-----|-----|-----|-----|-----|
| <b>Exon1</b>   |    |    | x  | x  |    |    | x  |    | x  | x   |     |     | x   | x   |     | x   |
| <b>Exon2</b>   | x  | x  | x  | x  | x  | x  | x  | x  | x  | x   | x   | x   | x   | x   | x   | x   |
| <b>Exon3</b>   | x  | x  | x  | x  | x  | x  | x  | x  | x  | x   | x   | x   | x   | x   | x   | x   |
| <b>Exon4</b>   | x  |    | x  | x  | x  | x  | x  | x  | x  | x   | x   | x   | x   | x   | x   | x   |
| <b>Exon5</b>   |    |    | x  | x  | x  |    |    | x  | x  | x   |     | x   | x   | x   | x   | x   |
| <b>Exon6</b>   |    | x  | x  | x  | x  | x  | x  | x  | x  | x   | x   | x   | x   | x   | x   | x   |
| <b>Exon7</b>   |    | x  | x  | x  | x  | x  | x  | x  | x  | x   | x   | x   | x   | x   | x   | x   |
| <b>Exon8</b>   |    | x  | x  | x  | x  | x  | x  | x  | x  | x   | x   | x   |     | x   | x   | x   |
| <b>Exon9</b>   | x  | x  | x  | x  | x  | x  | x  | x  | x  | x   | x   | x   | x   | x   | x   | x   |
| <b>Exon10</b>  | x  | x  | x  | x  | x  | x  | x  | x  | x  | x   | x   | x   | x   | x   | x   | x   |
| <b>Exon11</b>  | x  | x  | x  | x  | x  | x  | x  | x  | x  | x   | x   | x   | x   | x   | x   | x   |
| <b>Exon12</b>  | x  | x  | x  | x  | x  | x  | x  | x  | x  | x   | x   | x   | x   | x   | x   | x   |
| <b>Exon13</b>  | x  | x  | x  | x  | x  | x  | x  | x  | x  | x   | x   | x   | x   | x   | x   | x   |
| <b>Exon14</b>  | x  | x  | x  | x  | x  | x  | x  | x  | x  | x   | x   | x   | x   | x   | x   | x   |
| <b>Exon15</b>  |    |    |    |    |    |    |    |    |    |     |     |     |     |     |     |     |
| <b>% total</b> | 60 | 73 | 93 | 93 | 87 | 80 | 87 | 87 | 93 | 93  | 80  | 87  | 87  | 93  | 87  | 93  |
| <b>exons</b>   |    |    |    |    |    |    |    |    |    |     |     |     |     |     |     |     |

Table S4: Exons covered  $\geq 5$  depth in the *VKORC1* gene

| Patient        | P1 | P2 | P3 | P4 | P5 | P6 | P7 | P8 | P9 | P10 | P11 | P12 | P13 | P14 | P15 | P16 |
|----------------|----|----|----|----|----|----|----|----|----|-----|-----|-----|-----|-----|-----|-----|
| <b>Exon1</b>   |    |    |    |    |    |    |    |    |    |     |     |     |     |     |     |     |
| <b>Exon2</b>   | x  | x  | x  | x  | x  | x  | x  | x  | x  | x   | x   | x   | x   | x   | x   | x   |
| <b>Exon3</b>   |    |    |    |    |    |    |    |    |    |     |     |     |     |     |     |     |
| <b>% total</b> | 33 | 33 | 33 | 33 | 33 | 33 | 33 | 33 | 33 | 33  | 33  | 33  | 33  | 33  | 33  | 33  |
| <b>exons</b>   |    |    |    |    |    |    |    |    |    |     |     |     |     |     |     |     |

Table S5: Exons covered  $\geq 20$  reads in the *ABCC6* gene

| Patient       | P1 | P2 | P3 | P4 | P5 | P6 | P7 | P8 | P9 | P10 | P11 | P12 | P13 | P14 | P15 | P16 |
|---------------|----|----|----|----|----|----|----|----|----|-----|-----|-----|-----|-----|-----|-----|
| <b>Exon1</b>  |    |    | x  | x  | x  | x  | x  | x  | x  | x   | x   | x   | x   | x   | x   | x   |
| <b>Exon2</b>  |    | x  | x  | x  | x  | x  | x  | x  | x  | x   | x   | x   | x   | x   | x   | x   |
| <b>Exon3</b>  | x  | x  | x  | x  | x  | x  | x  | x  | x  | x   | x   | x   | x   | x   | x   | x   |
| <b>Exon4</b>  |    | x  | x  | x  | x  | x  | x  | x  | x  | x   | x   | x   | x   | x   | x   | x   |
| <b>Exon5</b>  |    |    | x  | x  | x  | x  | x  | x  | x  | x   | x   | x   | x   | x   | x   | x   |
| <b>Exon6</b>  |    |    | x  | x  | x  | x  | x  | x  | x  | x   | x   | x   | x   | x   | x   | x   |
| <b>Exon7</b>  |    |    | x  | x  | x  | x  | x  | x  | x  | x   | x   | x   | x   | x   | x   | x   |
| <b>Exon8</b>  |    |    | x  | x  | x  |    | x  | x  | x  | x   | x   | x   | x   | x   | x   | x   |
| <b>Exon9</b>  |    |    | x  | x  | x  |    | x  | x  | x  | x   | x   | x   | x   | x   | x   | x   |
| <b>Exon10</b> |    |    | x  | x  |    |    | x  |    |    |     |     | x   | x   | x   |     | x   |
| <b>Exon11</b> |    |    |    |    |    |    |    |    |    |     |     |     | x   | x   | x   |     |
| <b>Exon12</b> |    |    |    | x  |    |    |    |    |    |     |     |     | x   | x   | x   |     |
| <b>Exon13</b> |    |    |    |    |    |    |    |    |    |     |     |     |     |     |     |     |
| <b>Exon14</b> |    |    | x  | x  |    |    |    | x  |    |     | x   | x   | x   | x   | x   | x   |
| <b>Exon15</b> |    |    | x  |    | x  |    |    | x  | x  | x   |     | x   | x   | x   | x   | x   |
| <b>Exon16</b> |    |    | x  | x  | x  | x  | x  | x  | x  | x   | x   | x   | x   | x   | x   | x   |
| <b>Exon17</b> |    |    | x  | x  | x  | x  | x  | x  | x  | x   | x   | x   | x   | x   | x   | x   |
| <b>Exon18</b> |    |    | x  | x  | x  | x  | x  | x  | x  | x   | x   | x   | x   | x   | x   | x   |
| <b>Exon19</b> |    |    | x  | x  | x  | x  | x  | x  | x  | x   | x   | x   | x   | x   | x   | x   |
| <b>Exon20</b> |    |    | x  | x  |    |    | x  | x  | x  | x   | x   | x   | x   | x   | x   | x   |
| <b>Exon21</b> |    |    | x  | x  | x  | x  | x  | x  | x  | x   | x   | x   | x   | x   | x   | x   |
| <b>Exon22</b> |    |    | x  | x  |    | x  | x  | x  |    |     |     |     |     | x   | x   |     |
| <b>Exon23</b> |    |    |    |    |    |    |    |    |    |     |     |     | x   |     |     |     |
| <b>Exon24</b> |    |    |    | x  | x  |    | x  |    |    |     | x   |     |     | x   |     | x   |

|                   |   |    |    |    |    |    |    |    |    |    |    |    |    |    |    |    |
|-------------------|---|----|----|----|----|----|----|----|----|----|----|----|----|----|----|----|
| <b>Exon25</b>     |   |    | x  |    |    |    |    | x  |    |    |    |    |    |    |    | x  |
| <b>Exon26</b>     | x | x  | x  | x  | x  | x  | x  | x  | x  | x  | x  | x  | x  | x  | x  | x  |
| <b>Exon27</b>     |   |    |    |    |    |    |    |    |    |    |    |    |    |    |    |    |
| <b>Exon28</b>     |   |    | x  | x  | x  | x  | x  | x  | x  | x  | x  | x  | x  | x  | x  | x  |
| <b>Exon29</b>     |   |    | x  | x  |    |    |    | x  |    |    |    | x  | x  | x  | x  | x  |
| <b>Exon30</b>     |   |    |    |    |    |    |    |    |    |    |    |    |    |    |    |    |
| <b>Exon31</b>     |   |    |    |    |    |    |    |    |    |    |    |    |    |    |    |    |
| <b>% of total</b> | 3 | 13 | 74 | 74 | 58 | 48 | 58 | 74 | 58 | 58 | 65 | 68 | 81 | 81 | 71 | 71 |
| <b>Exon</b>       |   |    |    |    |    |    |    |    |    |    |    |    |    |    |    |    |

---

Table S6: Exons covered  $\geq 20$  reads in the *ENPP1* gene

| Patient       | P1 | P2 | P3 | P4 | P5 | P6 | P7 | P8 | P9 | P10 | P11 | P12 | P13 | P14 | P15 | P16 |
|---------------|----|----|----|----|----|----|----|----|----|-----|-----|-----|-----|-----|-----|-----|
| <b>Exon1</b>  |    |    |    |    |    |    |    |    |    |     |     |     |     |     |     |     |
| <b>Exon2</b>  |    |    |    |    |    |    |    |    | x  |     |     |     | x   |     | x   | x   |
| <b>Exon3</b>  |    |    | x  | x  | x  | x  | x  | x  | x  | x   | x   | x   | x   | x   | x   | x   |
| <b>Exon4</b>  |    |    | x  | x  |    | x  |    | x  | x  | x   | x   | x   | x   | x   | x   | x   |
| <b>Exon5</b>  |    |    |    |    |    |    |    |    |    |     |     |     |     |     |     |     |
| <b>Exon6</b>  |    |    |    |    |    |    |    |    | x  |     |     |     |     |     |     |     |
| <b>Exon7</b>  |    |    |    |    |    |    |    |    | x  |     |     | x   |     |     |     |     |
| <b>Exon8</b>  |    |    |    |    |    |    |    |    | x  | x   |     |     |     |     | x   |     |
| <b>Exon9</b>  |    |    |    | x  | x  | x  |    | x  | x  | x   | x   | x   | x   | x   | x   | x   |
| <b>Exon10</b> |    |    |    |    | x  | x  |    | x  | x  | x   |     | x   | x   | x   | x   |     |
| <b>Exon11</b> |    |    |    |    |    |    |    |    | x  | x   |     |     |     |     |     | x   |
| <b>Exon12</b> |    |    | x  | x  | x  | x  | x  | x  | x  | x   |     | x   | x   | x   | x   |     |
| <b>Exon13</b> |    |    |    |    |    |    |    |    | x  |     |     | x   |     |     |     |     |
| <b>Exon14</b> |    |    |    |    |    |    |    |    |    | x   | x   |     |     |     |     |     |
| <b>Exon15</b> |    |    | x  | x  | x  | x  | x  | x  | x  | x   | x   | x   | x   | x   | x   | x   |
| <b>Exon16</b> |    |    |    |    |    |    |    |    |    |     |     |     |     |     |     |     |
| <b>Exon17</b> |    |    | x  |    | x  | x  | x  | x  | x  | x   | x   | x   | x   | x   | x   | x   |
| <b>Exon18</b> |    |    | x  | x  | x  | x  | x  | x  | x  | x   | x   | x   | x   | x   | x   | x   |
| <b>Exon19</b> |    |    | x  |    |    |    |    |    |    |     |     |     |     |     |     |     |
| <b>Exon20</b> |    |    |    |    | x  | x  |    | x  | x  | x   |     | x   | x   | x   | x   | x   |
| <b>Exon21</b> |    |    |    |    |    |    |    |    | x  |     |     | x   |     |     |     | x   |
| <b>Exon22</b> |    |    |    |    |    |    |    |    |    |     |     |     |     | x   |     |     |
| <b>Exon23</b> |    |    | x  | x  | x  | x  | x  | x  | x  | x   | x   | x   | x   | x   | x   | x   |



**Exon24**                    x            x    x                    x    x    x    x    x                    x    x

**Exon25** 

**% of total**    0    0    36    28    40    44    24    40    72    56    36    56    48    44    60    40

**Exon**

---

Table S7: Exon covered  $\geq 20$  reads in the *GGCX* gene

| Patient           | P1 | P2 | P3 | P4 | P5 | P6 | P7 | P8 | P9 | P10 | P11 | P12 | P13 | P14 | P15 | P16 |
|-------------------|----|----|----|----|----|----|----|----|----|-----|-----|-----|-----|-----|-----|-----|
| <b>Exon1</b>      |    |    |    |    |    |    |    |    |    |     |     |     |     |     |     |     |
| <b>Exon2</b>      |    |    | x  | x  | x  |    | x  | x  | x  | x   | x   |     | x   | x   | x   | x   |
| <b>Exon3</b>      |    |    | x  | x  | x  | x  | x  | x  | x  | x   | x   | x   | x   | x   | x   | x   |
| <b>Exon4</b>      |    |    |    | x  |    |    |    |    | x  | x   |     |     | x   | x   |     | x   |
| <b>Exon5</b>      |    |    |    |    |    |    |    |    |    |     |     |     |     |     |     |     |
| <b>Exon6</b>      |    |    |    | x  |    |    |    |    | x  |     |     | x   |     | x   | x   | x   |
| <b>Exon7</b>      |    |    |    | x  | x  |    | x  | x  | x  |     |     |     | x   | x   | x   | x   |
| <b>Exon8</b>      |    |    |    |    |    |    | x  |    |    |     |     |     |     |     |     |     |
| <b>Exon9</b>      |    |    | x  | x  | x  | x  | x  | x  | x  | x   | x   | x   | x   | x   | x   | x   |
| <b>Exon10</b>     |    |    | x  | x  | x  | x  | x  | x  | x  | x   | x   | x   | x   | x   | x   | x   |
| <b>Exon11</b>     |    |    | x  |    | x  |    | x  |    | x  |     | x   |     | x   | x   |     | x   |
| <b>Exon12</b>     |    |    | x  | x  | x  | x  | x  | x  | x  | x   | x   | x   | x   | x   | x   | x   |
| <b>Exon13</b>     |    |    | x  | x  | x  | x  | x  | x  | x  | x   | x   | x   | x   | x   | x   | x   |
| <b>Exon14</b>     |    |    | x  | x  |    | x  |    |    | x  | x   | x   | x   | x   | x   | x   | x   |
| <b>Exon15</b>     |    |    |    |    |    |    |    |    |    |     |     |     |     |     |     |     |
| <b>% of total</b> | 0  | 0  | 53 | 67 | 53 | 40 | 60 | 47 | 73 | 53  | 53  | 47  | 67  | 73  | 60  | 73  |
| <b>Exon</b>       |    |    |    |    |    |    |    |    |    |     |     |     |     |     |     |     |

Table S8: Exon covered  $\geq 20$  reads in the *VKORC1* gene

| Patient           | P1 | P2 | P3 | P4 | P5 | P6 | P7 | P8 | P9 | P10 | P11 | P12 | P13 | P14 | P15 | P16 |
|-------------------|----|----|----|----|----|----|----|----|----|-----|-----|-----|-----|-----|-----|-----|
| <b>Exon1</b>      |    |    |    |    |    |    |    |    |    |     |     |     |     |     |     |     |
| <b>Exon2</b>      |    |    |    |    | x  | x  |    |    | x  |     | x   | x   | x   | x   | x   | x   |
| <b>Exon3</b>      |    |    |    |    |    |    |    |    |    |     |     |     |     |     |     |     |
| <b>% of total</b> | 0  | 0  | 0  | 0  | 33 | 33 | 0  | 0  | 33 | 0   | 33  | 33  | 33  | 33  | 33  | 33  |
| <b>Exon</b>       |    |    |    |    |    |    |    |    |    |     |     |     |     |     |     |     |

Table S9: List of polymorphisms found in *ABCC6*, *ENPP1*, *GGCX* and *VKORC1* in the 16 patients.

| Gene                         | Patient                      | Polymorphism                  |              |          |
|------------------------------|------------------------------|-------------------------------|--------------|----------|
|                              |                              | Exonic                        | Intronic     | UTR3     |
| <i>ABCC6</i>                 | P1                           | NM_001171:c.G3803A:p.(R1268Q) | c.1338+20C>G |          |
|                              |                              | NM_001171:c.A2542G:p.(M848V)  | c.1338+7C>A  |          |
|                              |                              | NM_001171:c.T1841C:p.(V614A)  |              |          |
|                              |                              | NM_001171:c.A2400G:p.(G800G)  |              |          |
|                              |                              | NM_001171:c.G1245A:p.(V415V)  |              |          |
|                              |                              | NM_001171:c.T1233C:p.(N411N)  |              |          |
|                              | P2                           | NM_001171:c.A2542G:p.(M848V)  | c.3633+55C>T |          |
|                              |                              | NM_001171:c.A2400G:p.(G800G)  | c.2787+62T>C |          |
|                              |                              | NM_001171:c.T1233C:p.(N411N)  | c.1635+48C>T |          |
|                              | P3                           | NM_001171:c.A2542G:p.(M848V)  | c.2787+62T>C | c.*17G>A |
|                              |                              | NM_001171:c.C1896A:p.(H632Q)  | c.1338+20C>G |          |
|                              |                              | NM_001171:c.T1841C:p.(V614A)  | c.1338+7C>A  |          |
|                              |                              | NM_001171:c.A2400G:p.(G800G)  |              |          |
|                              |                              | NM_001171:c.C1890G:p.(T630T)  |              |          |
|                              |                              | NM_001171:c.G1245A:p.(V415V)  |              |          |
|                              | P4                           | NM_001171:c.A2542G:p.(M848V)  | c.2787+62T>C |          |
|                              |                              | NM_001171:c.C1896A:p.(H632Q)  |              |          |
|                              |                              | NM_001171:c.T1841C:p.(V614A)  |              |          |
|                              |                              | NM_001171:c.A793G:p.(R265G)   |              |          |
|                              |                              | NM_001171:c.C2490T:p.(A830A)  |              |          |
| NM_001171:c.A2400G:p.(G800G) |                              |                               |              |          |
| NM_001171:c.C1890G:p.(T630T) |                              |                               |              |          |
| P5                           | NM_001171:c.A2542G:p.(M848V) | c.2787+62T>C                  |              |          |
|                              | NM_001171:c.C1896A:p.(H632Q) | c.1635+48C>T                  |              |          |
|                              | NM_001171:c.T1841C:p.(V614A) | c.1338+20C>G                  |              |          |
|                              | NM_001171:c.C2490T:p.(A830A) |                               |              |          |
|                              | NM_001171:c.A2400G:p.(G800G) |                               |              |          |
|                              | NM_001171:c.C1890G:p.(T630T) |                               |              |          |

|  |     |                                                                                                                                                                                                                                                              |                                                                              |          |
|--|-----|--------------------------------------------------------------------------------------------------------------------------------------------------------------------------------------------------------------------------------------------------------------|------------------------------------------------------------------------------|----------|
|  | P6  | NM_001171:c.A2542G:p.(M848V)<br>NM_001171:c.T1841C:p.(V614A)<br>NM_001171:c.C2835T:p.(P945P)<br>NM_001171:c.A2400G:p.(G800G)<br>NM_001171:c.G1245A:p.(V415V)<br>NM_001171:c.T1233C:p.(N411N)                                                                 | c.2787+62T>C<br>c.1338+20C>G<br>c.1338+7C>A                                  |          |
|  | P7  | NM_001171:c.G3803A:p.(R1268Q)<br>NM_001171:c.C3190T:p.(R1064W)<br>NM_001171:c.A2542G:p.(M848V)<br>NM_001171:c.A2400G:p.(G800G)                                                                                                                               | c.2787+62T>C<br>c.1635+48C>T<br>c.1338+20C>G<br>c.1338+7C>A                  |          |
|  | P8  | NM_001171:c.G3803A:p.(R1268Q)<br>NM_001171:c.A2542G:p.(M848V)<br>NM_001171:c.C1896A:p.(H632Q)<br>NM_001171:c.T1841C:p.(V614A)<br>NM_001171:c.A793G:p.(R265G)<br>NM_001171:c.C2490T:p.(A830A)<br>NM_001171:c.A2400G:p.(G800G)<br>NM_001171:c.C1890G:p.(T630T) | c.2787+62T>C                                                                 |          |
|  | P9  | NM_001171:c.A2542G:p.(M848V)<br>NM_001171:c.T1841C:p.(V614A)<br>NM_001171:c.A2400G:p.(G800G)                                                                                                                                                                 | c.2787+62T>C                                                                 | c.*17G>A |
|  | P10 | NM_001171:c.A2542G:p.(M848V)<br>NM_001171:c.C1896A:p.(H632Q)<br>NM_001171:c.T1841C:p.(V614A)<br>NM_001171:c.C2490T:p.(A830A)<br>NM_001171:c.A2400G:p.(G800G)<br>NM_001171:c.C1890G:p.(T630T)                                                                 | c.2787+62T>C<br>c.1338+20C>G<br>c.1338+7C>A                                  |          |
|  | P11 | NM_001171:c.A2542G:p.(M848V)<br>NM_001171:c.A2400G:p.(G800G)                                                                                                                                                                                                 | c.4042-30C>T<br>c.3633+55C>T                                                 |          |
|  | P12 | NM_001171:c.A2542G:p.(M848V)<br>*NM_001171:c.C1353T:p.(S451S)<br>NM_001171:c.A2400G:p.(G800G)<br>NM_001171:c.G1245A:p.(V415V)<br>NM_001171:c.T1233C:p.(N411N)                                                                                                | *c.4042-35G>A<br>c.3507-16T>C<br>c.2787+62T>C<br>c.1338+20C>G<br>c.1338+7C>A |          |

|      |     |                                                                                                                                                                                              |                                                                              |  |
|------|-----|----------------------------------------------------------------------------------------------------------------------------------------------------------------------------------------------|------------------------------------------------------------------------------|--|
|      | P13 | *NM_001171:c.C1353T:p.(S451S)<br>NM_001171:c.A2542G:p.(M848V)<br>NM_001171:c.A2400G:p.(G800G)<br>NM_001171:c.G1245A:p.(V415V)<br>NM_001171:c.T1233C:p.(N411N)                                | *c.4042-35G>A<br>c.3507-16T>C<br>c.2787+62T>C<br>c.1338+20C>G<br>c.1338+7C>A |  |
|      | P14 | *NM_001171:c.C1353T:p.(S451S)<br>NM_001171:c.A2542G:p.(M848V)<br>NM_001171:c.A2400G:p.(G800G)<br>NM_001171:c.G1245A:p.(V415V)<br>NM_001171:c.T1233C:p.(N411N)                                | *c.4042-35G>A<br>c.3507-16T>C<br>c.2787+62T>C<br>c.1338+20C>G<br>c.1338+7C>A |  |
|      | P15 | NM_001171:c.A2542G:p.(M848V)<br>NM_001171:c.T1841C:p.(V614A)<br>NM_001171:c.C2835T:p.(P945P)<br>NM_001171:c.A2400G:p.(G800G)<br>NM_001171:c.G1245A:p.(V415V)<br>NM_001171:c.T1233C:p.(N411N) | c.2787+62T>C<br>c.1338+20C>G<br>c.1338+7C>A                                  |  |
|      | P16 | NM_001171:c.A2542G:p.(M848V)<br>NM_001171:c.C1896A:p.(H632Q)<br>NM_001171:c.T1841C:p.(V614A)<br>NM_001171:c.C2490T:p.(A830A)<br>NM_001171:c.A2400G:p.(G800G)<br>NM_001171:c.C1890G:p.(T630T) | c.2787+62T>C<br>c.1635+48C>T<br>c.1338+7C>A                                  |  |
| GGCX | P1  | NM_001142269:c.A666C:p.(G222G)                                                                                                                                                               | c.44-32G>A                                                                   |  |
|      | P2  | NM_001142269:c.A666C:p.(G222G)<br>NM_000821:c.C189T:p.(S63S)                                                                                                                                 | c.2084+45G>C<br>c.44-32G>A                                                   |  |
|      | P3  | NM_001142269:c.C1071T:p.(T357T)<br>NM_001142269:c.C1047T:p.(R349R)<br>NM_001142269:c.G803A:p.(R268Q)<br>NM_001142269:c.A666C:p.(G222G)                                                       |                                                                              |  |
|      | P4  | NM_001142269:c.C1047T:p.(R349R)<br>NM_001142269:c.G803A:p.(R268Q)<br>NM_001142269:c.A666C:p.(G222G)                                                                                          |                                                                              |  |
|      | P5  | NM_001142269:c.C1071T:p.(T357T)<br>NM_001142269:c.A666C:p.(G222G)                                                                                                                            |                                                                              |  |

|              |     |                                                                                                     |              |  |
|--------------|-----|-----------------------------------------------------------------------------------------------------|--------------|--|
|              | P6  | NM_001142269:c.C1047T:p.(R349R)<br>NM_001142269:c.G803A:p.(R268Q)<br>NM_001142269:c.A666C:p.(G222G) |              |  |
|              | P7  | NM_001142269:c.C1071T:p.(T357T)<br>NM_001142269:c.A666C:p.(G222G)                                   |              |  |
|              | P8  | NM_001142269:c.C1071T:p.(T357T)<br>NM_001142269:c.A666C:p.(G222G)                                   |              |  |
|              | P9  | NM_001142269:c.C1047T:p.(R349R)<br>NM_001142269:c.G803A:p.(R268Q)<br>NM_001142269:c.A666C:p.(G222G) | c.2085-21C>T |  |
|              | P10 | NM_001142269:c.C1071T:p.(T357T)<br>NM_001142269:c.A666C:p.(G222G)                                   |              |  |
|              | P11 | NM_001142269:c.C1047T:p.(R349R)<br>NM_001142269:c.G803A:p.(R268Q)<br>NM_001142269:c.A666C:p.(G222G) |              |  |
|              | P12 | NM_001142269:c.C1047T:p.(R349R)<br>NM_001142269:c.G803A:p.(R268Q)<br>NM_001142269:c.A666C:p.(G222G) |              |  |
|              | P13 | NM_001142269:c.C1047T:p.(R349R)<br>NM_001142269:c.G803A:p.(R268Q)<br>NM_001142269:c.A666C:p.(G222G) |              |  |
|              | P14 | NM_001142269:c.A666C:p.(G222G)                                                                      |              |  |
|              | P16 | NM_001142269:c.C1071T:p.(T357T)<br>NM_001142269:c.A666C:p.(G222G)                                   |              |  |
| <i>ENPP1</i> | P1  | NM_006208:c.A517C:p.(K173Q)                                                                         |              |  |
|              | P6  | NM_006208:c.A517C:p.(K173Q)                                                                         |              |  |
|              | P8  | NM_006208:c.C2320T:p.(R774C)                                                                        |              |  |
|              | P10 | NM_006208:c.C2320T:p.(R774C)                                                                        |              |  |
|              | P11 | NM_006208:c.A2661G:p.(A887A)                                                                        |              |  |

|  |     |                                                                                                                             |  |  |
|--|-----|-----------------------------------------------------------------------------------------------------------------------------|--|--|
|  | P12 | NM_006208:c.A517C:p.(K173Q)<br>NM_006208:c.T1056G:p.(A352A)<br>NM_006208:c.T1329C:p.(D443D)<br>NM_006208:c.A2661G:p.(A887A) |  |  |
|  | P13 | NM_006208:c.A517C:p.(K173Q)<br>NM_006208:c.T1056G:p.(A352A)<br>NM_006208:c.T1329C:p.(D443D)<br>NM_006208:c.A2661G:p.(A887A) |  |  |
|  | P14 | NM_006208:c.A517C:p.(K173Q)<br>NM_006208:c.T1056G:p.(A352A)<br>NM_006208:c.T1329C:p.(D443D)                                 |  |  |



Table S10: Minor Allele Frequency (MAF) of polymorphisms in *ABCC6*, *GGCX*, and *ENPP1*

| Gene         | Polymorphisms                |                  |         |             |                  | Patient ID    |
|--------------|------------------------------|------------------|---------|-------------|------------------|---------------|
|              | Amino acid change            | Location in gene | Hom/het | ESP5400_ALL | 1000g2012feb_ALL |               |
| <b>ABCC6</b> | c.4042-35G>A                 | intronic         | het     | 0.0015%     | 0.0005%          | P12, P13      |
|              | NM_001171:c.C1353T:p.(S451S) | exonic           | het     | 0.0008%     | 0.0005%          | P12, P13      |
| <b>GGCX</b>  | NM_000821:c.C189T:p.(S63S)   | exonic           | het     | 0.0028%     | 0.0014%          | P2            |
| <b>ENPP1</b> | NM_006208:c.T1329C:p.(D443D) | exonic           | het     | 0.0185%     | 0.01%            | P12, P13, P15 |

Hom: homozygous; Het: heterozygous

Table S11: List of possible homozygous mutations in two PXE-patients with one *ABCC6* mutation, after filtering based on population frequency of  $\leq 1\%$  and an *in silico* functional prediction of 'deleterious' (SIFT) or 'probably damaging' (polyphen)

| Patient | Rs number | Population frequency | Gene         | Nucleotide change | Change in protein | Type of mutation | Variant location | Function of the gene                                                                                                           |
|---------|-----------|----------------------|--------------|-------------------|-------------------|------------------|------------------|--------------------------------------------------------------------------------------------------------------------------------|
| F5      | NA        | NA                   | <i>PTPRH</i> | c.2512C>A         | p.(P838T)         | missense         | Exon             | - Receptor-type tyrosine-protein phosphatase H                                                                                 |
| F5      | NA        | NA                   | <i>PTPRH</i> | c.3046C>A         | p.(P1016T)        | missense         | Exon             | - Regulates a variety of cellular processes including cell growth, differentiation, mitotic cycle and oncogenic transformation |
| F16     | NA        | NA                   | FUK          | c.380T>C          | p.(L127P)         | missense         | Exon             | - Fucokinase<br>- Involved in reutilization of fucose from the degradation of oligosaccharides                                 |

NA: not applicable

Table S12: List of possible second gene mutations in two PXE-patients with one *ABCC6* mutation, after filtering based on population frequency of  $\leq 1\%$  and an *in silico* functional prediction of 'deleterious' (SIFT) or 'probably damaging' (polyphen)

| Patient | Rs number   | Population frequency | Gene           | Nucleotide change | Aminoacid change | Type of mutation | Variant location | Function of the gene                                                                                                                                                                                                                                     |
|---------|-------------|----------------------|----------------|-------------------|------------------|------------------|------------------|----------------------------------------------------------------------------------------------------------------------------------------------------------------------------------------------------------------------------------------------------------|
| P5, 16  | rs138052077 | 0.0005               | <i>ZC3H12C</i> | c.658C>T          | p.(A220T)        | Missense         | Exon             | - Zinc finger CCCH-type containing 12C<br>- Acts as RNase and regulates the levels of target RNA species                                                                                                                                                 |
| P5, 16  | rs141683209 | 0.000617             | <i>TULP4</i>   | c.4396G>A         | p.(V1466M)       | Missense         | Exon             | - Tubby like protein 4<br>- Mediates the ubiquitination and subsequent proteasomal degradation of target proteins.                                                                                                                                       |
| P5      | rs146857860 | 0.000396             | <i>PCDHGA2</i> | c.529C>A          | p.(H177A)        | Missense         | Exon             | - Protocadherin gamma subfamily A, 2                                                                                                                                                                                                                     |
| P5      | rs146857860 | 0.000396             | <i>PCDHGA2</i> | c.529C>A          | p.(H177A)        | Missense         | Exon             | - Involved in neuronal connections in the brain.                                                                                                                                                                                                         |
| P5, 16  | rs138308587 | 0.000566             | <i>ACAA1</i>   | c.1166C>T         | p.(T389M)        | Missense         | Exon             | - Acetyl-CoA acyltransferase 1                                                                                                                                                                                                                           |
| P5, 16  | rs138308587 | 0.000566             | <i>ACAA1</i>   | c.887C>T          | p.(T296M)        | Missense         | Exon             | - Involved in the beta-oxidation system of the peroxisomes                                                                                                                                                                                               |
| P16     | rs139927121 | 0.000242             | <i>SPANXC</i>  | c.103C>T          | p.(P35S)         | Missense         | Exon             | - Sperm protein associated with the nucleus on the X chromosome, family member C<br>- Maturation of spermatozoa                                                                                                                                          |
| P16     | rs201057336 | 0.001                | <i>SUPV3L1</i> | c.1565A>G         | p.(T522C)        | Missense         | Exon             | - Suppressor of Var1, 3-Like 1<br>- Plays a role in mitochondrial RNA metabolism                                                                                                                                                                         |
| P16     | rs146579435 | 0.00022              | <i>FLNB</i>    | c.5974C>T         | p.(A1992C)       | Missense         | Exon             | -                                                                                                                                                                                                                                                        |
| P16     | rs146579435 | 0.00022              | <i>FLNB</i>    | c.6007C>T         | p.(A2003C)       | Missense         | Exon             | - Filamin B, beta<br>- Regulates intracellular communication                                                                                                                                                                                             |
| P16     | rs146579435 | 0.00022              | <i>FLNB</i>    | c.6100C>T         | p.(A2034C)       | Missense         | Exon             | -                                                                                                                                                                                                                                                        |
| P16     | rs138073376 | 0.0005               | <i>PPEF2</i>   | c.2026G>A         | p.(G676L)        | Missense         | Exon             | - Protein phosphatase, EF-hand calcium binding domain 2<br>- Acts as calcium sensing regulator of ionic currents, energy production or synaptic transmission.                                                                                            |
| P16     | rs144374710 | 0.000662             | <i>PRR15L</i>  | c.50A>T           | p.(L17I)         | Missense         | Exon             | - Proline rich 15L<br>- Unknown function                                                                                                                                                                                                                 |
| P16     | rs150626138 | 0.00022              | <i>CEACAM1</i> | c.442T>C          | p.(S148P)        | Missense         | Exon             | - Carcinoembryonic antigen-related cell adhesion molecule 1<br>- Plays a role in differentiation and arrangement of tissue structure, angiogenesis, apoptosis, tumor suppression, metastasis, and the modulation of innate and adaptive immune responses |
| P16     | rs150711066 | 0.000742             | <i>PALLD</i>   | c.1040C>T         | p.(T347M)        | Missense         | Exon             | - Palladin<br>- Organizing the structure of cytoskeleton                                                                                                                                                                                                 |
| P16     | rs139560362 | 0.000909             | <i>QTRT1</i>   | c.349C>A          | p.(L117M)        | Missense         | Exon             | - Queuine tRNA-ribosyltransferase 1<br>- Involved in tRNA modification                                                                                                                                                                                   |
| P16     | rs142863092 | 0.000396             | <i>PVRL1</i>   | c.629G>A          | p.(A210H)        | Missense         | Exon             | - Poliovirus receptor-related 1<br>- Involved in organization of adherens junctions and tight junctions in epithelial and endothelial cells                                                                                                              |

Table S13: List of primers used in Sanger sequencing

| Gene         | Exon        | Forward primer 5'-3'             | Reversed primer 5'-3'        |
|--------------|-------------|----------------------------------|------------------------------|
| <b>ABCC6</b> | exon 1      | GGTCCAAAGTGT <u>TTA</u> GGAAAGTC | GCAGCCCCGAGAGATCTGCAGC       |
|              | exon 2      | GATCCAAAAAGTTGCCTGGC             | TGTCCCCTGCCTCCCCC <u>GAA</u> |
|              | exon 3-4    | TCCCAGTTGGACATGGGGCC             | TATAAGTGTGTGCATCGTGT         |
|              | exon 5      | CCTCCTCTGTCTCCATTCTTAT           | AGACTGAGACCTCAAAGTGG         |
|              | exon 6      | CACAGTTCGTCCTGTCTTCCTAC          | TGGCCCTGGAGAAGCAGCTGT        |
|              | exon 7      | GTGACTTACCCAGGGTCACAC            | ATGATGAGCTTTTCTGAAGT         |
|              | exon 8      | CCCCCAACTCCCATGATTGC             | AAGGATGCCACTAAGAGACC         |
|              | exon 9      | AGGCACCTCCTCTCACCAGC             | GGTGACAGAGCAAGACTCCA         |
|              | exon 10     | TGGGTGGAGAAGCCACCTGG             | GGGGGACTCCGTTCAAAT           |
|              | exon 11     | TCTGAGAGCTGGGCTCCTCG             | CAGGACCTGTGGCTTCCTCC         |
|              | exon 12     | GGTGGCTGTCAGGGTGCAGG             | CCACCTACCTCACCTGCCC          |
|              | exon 13     | AGGCTGCCCTATCCATGCTTGC           | GGAAGCTGGAGCCAGGTGTAG        |
|              | exon 14     | AGACACCGACACCCAAAACC             | TGCTGGCTTGCCATTATGGG         |
|              | exon 15     | CTCTCCGATGCAGAGGCC               | CTACACCACCTCTCAGGTG          |
|              | exon 16     | TCACAGAGGCGGGCTGAACC             | AGTGGGACTTTTCAGGATGGG        |
|              | exon 17     | AACCTATCCCACCTCTGTCC             | TCGGGGACCCAAATGACTCC         |
|              | exon 18     | CAGTTTCACCCTGTAGATGC             | ATGCTAAGTGCTTCCTCTGC         |
|              | exon 19     | CATGTGTGTAACCTTCTACCC            | GCCAGTAGGACCTTCGAGC          |
|              | exon 20     | GTGTCAAAGTGGGTATCTGG             | TCAGCTACTTCAGCTTCAGC         |
|              | exon 21     | CCTGAGGGTTAGGCACATAC             | GCTACATTTGGTGGGAGGAC         |
|              | exon 22     | TCGCCTGGCCTTGCTCAACC             | GTAAGGAGTCCTGAGCACC          |
|              | exon 23     | CCGCTCCTGAGGGTCTCCAG             | GCTGGGTGAAACCTCATATATGG      |
|              | exon 24     | CTACCTCTCTATGTCTGTGG             | ATATGACCTCAGGTCTCACC         |
|              | exon 25     | CTTGTGCCCAGAGAAGCATC             | AGGGGTCCGACAGTCTCTG          |
|              | exon 26     | CTGTTGCAAGCCCTCAAGTG             | AGCAGATGTCAACAGGGACC         |
|              | exon 27     | GTGAAGTCTTAGAGGAAGGC             | TTGTCCCTGGAGTCCTTTGG         |
|              | exon 28     | AATGCCACAAACCCTCTGG              | ACCATGCCTCCCATCTTTGC         |
|              | exon 29     | AAAGATGGGAGGCATGGTG              | TCAGAGCTTGAATTGCAGATA        |
|              | exon 30     | ACCCACACATCACCATGTGC             | ACTGCAGGGCTGCTGTGAGG         |
|              | exon 31     | AGAGCCTCTGTCTCCCTCT              | TCCAGCACTGCAGGCTGTGC         |
|              | <b>GGCX</b> | exon 7                           | AAGAGATCTGGAGCACTGG          |

*ABCC6*-specific primers designed based on sequence differences between *ABCC6* and its two pseudo genes. Underlined nucleotides eliminate the amplification of both pseudogenes, underlined nucleotides eliminate *ABCC6-ψ2*, nucleotides in bold eliminate *ABCC6-ψ1*.
